# Supplementary material
Source: publisher site journal article supplement (https://www.dovepress.com/article/512984)
Supplement: Supplementary file 1 [file 512984%20Supplementary%20Material.docx]

**SUPPLEMENTAL TABLE LEGENDS**

**Table SI. English-version of the questionnaire used in the study**

| For each statement below, you may choose from six possible answers. There are no right or wrong answers. Answer as spontaneously as possible while thinking about your situation over the last 4 weeks | Always | Usually | Sometimes | Rarely | Never | Not applicable |
| --- | --- | --- | --- | --- | --- | --- |
| I experience difficulties in moving around school due to my condition |  |  |  |  |  |  |
| I experience difficulties in engaging in the classes that require physical activities |  |  |  |  |  |  |
| I experience discrimination from teachers or students during classes or exams |  |  |  |  |  |  |
| I experience stigmatization from others like staring, or teasing |  |  |  |  |  |  |
| I was bullied at school by verbal or physical means |  |  |  |  |  |  |
| I try to cover my skin lesions to avoid others staring at me |  |  |  |  |  |  |
| I experience false judgment from others to have learning or cognitive disability due to my condition |  |  |  |  |  |  |
| I have difficulties in making new friends. |  |  |  |  |  |  |
| I have difficulties in maintaining my friendships with others |  |  |  |  |  |  |
| I fear having itchy or painful skin when surrounded by others |  |  |  |  |  |  |
| I require extra lessons or online classes that are costly to my family |  |  |  |  |  |  |
| I experience difficulties during handwriting |  |  |  |  |  |  |
| I miss many school days due to my condition in away that affected my academic performance |  |  |  |  |  |  |
| At school, I receive help from a caregiver with my basic needs (e.g. hygiene, food, and safety) |  |  |  |  |  |  |
| I receive help from a caregiver with my educational needs (e.g. writing). |  |  |  |  |  |  |
| I receive help during exams and assignments (e.g. by providing me extra time) |  |  |  |  |  |  |
| I receive adaptation in the classroom (e.g. keeping class temperature cool) |  |  |  |  |  |  |

**Table S2. Students with EB perspectives and perceptions towards school choices**

| For each statement below, you may choose from six possible answers. There are no right or wrong answers. | Strongly Agree | Agree | Neutral | Disagree | Strongly Disagree | Not applicable |
| --- | --- | --- | --- | --- | --- | --- |
| Traditional schooling is difficult to adapt due to physical, mental and social problems |  |  |  |  |  |  |
| I prefer home schooling over traditional schooling |  |  |  |  |  |  |
| I believe home schooling will help in enhancing my school performance more than traditional schooling |  |  |  |  |  |  |
| I believe having relationships and socializing with others at school is important |  |  |  |  |  |  |
| Traditional schooling will be better if several improvements in the overall system are made |  |  |  |  |  |  |
| I prefer home or online schooling. However, I couldn’t have this option |  |  |  |  |  |  |
